# Supplementary material for: Investigation of thermal control in phase-changing ABO3 perovskites via first-principles predictions: general mechanism of emittance
Source: Royal Society of Chemistry journal article supplement (doi:10.1039/d2cp05693c), 2023-01-01
Supplement: d2cp05693c1.pdf [file d2cp05693c1.pdf]

## SUPPLEMENTARY INFORMATION

### Investigation of thermal control in phase-changing $ABO_3$ perovskites via first-principles predictions: General mechanism of emittance

Received 00th January 20xx,  
Accepted 00th January 20xx

DOI: 10.1039/x0xx00000x

Liping Tong <sup>a</sup>, Nianao Xu <sup>a</sup>, Hongchao Li <sup>a</sup>, Lan Yang <sup>a</sup>, Zhongyang Wang <sup>\* a</sup>, Qixin Guo <sup>b</sup>, Tongxiang Fan <sup>\* a</sup>

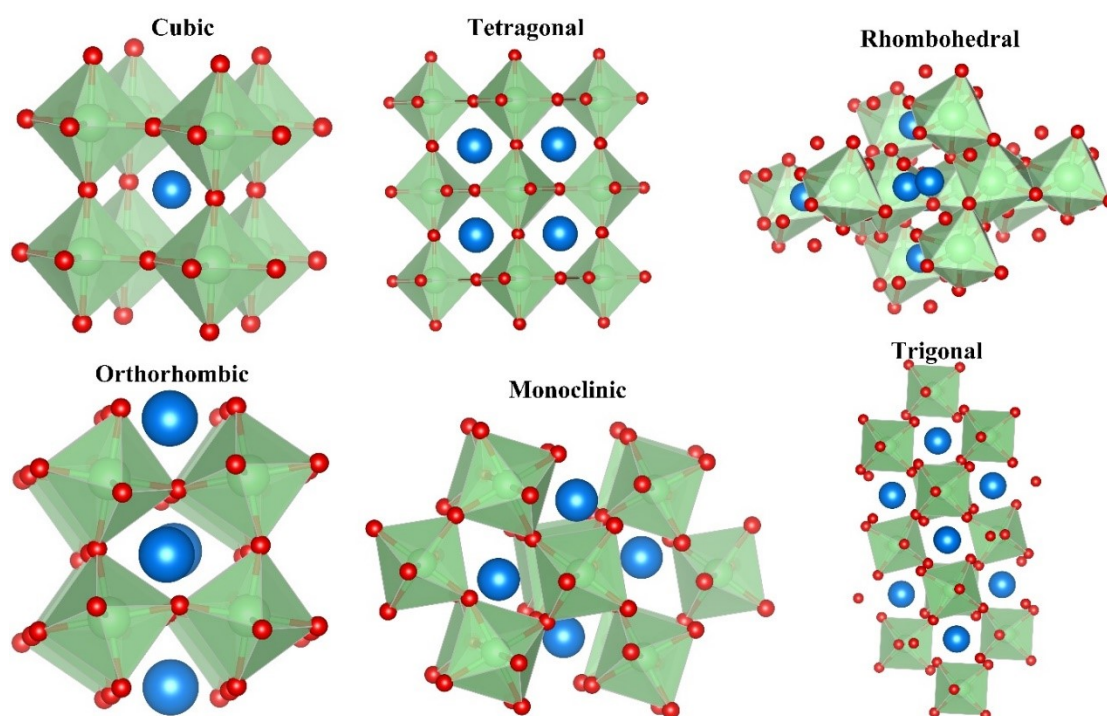

Fig. S1. Fragment of the crystal structures of the ideal orthorhombic, cubic, monoclinic, tetragonal, trigonal and rhombohedral perovskites. A cation is blue ball, B cation is green ball and the cornersharing  $BO_6$  octahedra is reseda network.

| Compounds            |                                                             | Crystal     |                    |                    |                    |                    |                    |                    |                  |                   |               |               |                  |
|----------------------|-------------------------------------------------------------|-------------|--------------------|--------------------|--------------------|--------------------|--------------------|--------------------|------------------|-------------------|---------------|---------------|------------------|
|                      |                                                             | Cubic, Pm3m | Orthorhombic, Pnma | Orthorhombic, Imma | Orthorhombic, Pbnm | Orthorhombic, Cmcm | Orthorhombic, Pba2 | Tetragonal, I4/mcm | Monoclinic, Pn21 | Rhombohedral, R3c | Triclinic, P1 | Trigonal, R3c | Hexagonal, P63cm |
| ANiO <sub>3</sub>    | A=La, Ce, Pr, Nd, Sm, Eu, Gd, Tb, Dy, Ho, Er, Tm, Yb, Lu, Y |             | ✓                  |                    |                    |                    |                    |                    | ✓                |                   |               |               |                  |
| DNiO <sub>3</sub>    | D=Ag, Ba, Ca, Eu, Pr, Sr                                    | ✓           | ✓                  |                    |                    |                    | ✓                  |                    |                  |                   |               |               |                  |
|                      | D=K, Na                                                     | ✓           | ✓                  |                    |                    |                    |                    | ✓                  |                  |                   |               |               |                  |
|                      | D=Li                                                        | ✓           | ✓                  |                    |                    |                    |                    |                    |                  |                   |               |               |                  |
| MSnO <sub>3</sub>    | M=Hg, Mg, Ni, Sr, Zn, Ba                                    | ✓           | ✓                  |                    |                    |                    | ✓                  |                    |                  |                   |               |               |                  |
|                      | M=Ca, Cd, Co, Fe, Mn, Ti, V                                 | ✓           | ✓                  |                    |                    |                    | ✓                  |                    |                  | ✓                 |               |               |                  |
| EuBO <sub>3</sub>    | B=Hf, Ti, Zr                                                | ✓           | ✓                  |                    |                    |                    | ✓                  |                    |                  |                   |               |               |                  |
| XTaO <sub>3</sub>    | X=Li, Na, K, Ag                                             | ✓           | ✓                  |                    |                    |                    | ✓                  |                    |                  |                   |               |               |                  |
| ETiO <sub>3</sub>    | E=Ti                                                        | ✓           | ✓                  |                    |                    |                    | ✓                  |                    |                  |                   |               |               |                  |
|                      | E=Mn                                                        | ✓           | ✓                  |                    |                    |                    |                    |                    |                  | ✓                 |               |               |                  |
|                      | E=Mg                                                        | ✓           | ✓                  |                    |                    |                    |                    |                    |                  |                   |               |               |                  |
|                      | E=Sr                                                        | ✓           | ✓                  |                    |                    |                    | ✓                  |                    |                  | ✓                 |               |               |                  |
|                      | E=Pb                                                        | ✓           |                    |                    |                    |                    | ✓                  |                    |                  |                   |               |               |                  |
| GZrO <sub>3</sub>    | G=Ba                                                        | ✓           |                    |                    |                    |                    | ✓                  |                    |                  |                   |               |               |                  |
|                      | G=Ca                                                        | ✓           | ✓                  |                    |                    |                    | ✓                  |                    |                  |                   |               |               |                  |
| LaTMFO <sub>3</sub>  | TM <sup>2+</sup> =Cr, Ga                                    | ✓           | ✓                  |                    |                    |                    |                    |                    |                  |                   |               | ✓             |                  |
|                      | TM <sup>2+</sup> =Ti, Sc                                    | ✓           | ✓                  |                    | ✓                  |                    |                    |                    |                  |                   |               |               |                  |
|                      | TM <sup>2+</sup> =Fe                                        | ✓           | ✓                  |                    |                    |                    | ✓                  |                    |                  |                   |               | ✓             |                  |
|                      | TM <sup>2+</sup> =Co                                        | ✓           | ✓                  |                    |                    |                    |                    | ✓                  | ✓                |                   | ✓             | ✓             |                  |
|                      | TM <sup>2+</sup> =Al                                        | ✓           |                    | ✓                  |                    | ✓                  |                    | ✓                  | ✓                |                   | ✓             | ✓             | ✓                |
|                      | TM <sup>2+</sup> =V                                         | ✓           | ✓                  |                    |                    |                    |                    |                    |                  |                   |               |               |                  |
| ZFeO <sub>3</sub>    | Z=Ba, Lu                                                    | ✓           | ✓                  |                    |                    |                    | ✓                  |                    |                  | ✓                 |               |               |                  |
| SrTMFO <sub>3</sub>  | TM <sup>1+</sup> =Mo                                        | ✓           | ✓                  |                    |                    |                    | ✓                  | ✓                  |                  |                   |               |               |                  |
|                      | TM <sup>1+</sup> =Zr                                        | ✓           |                    | ✓                  |                    | ✓                  | ✓                  |                    |                  |                   |               |               |                  |
|                      | TM <sup>1+</sup> =Hf                                        | ✓           | ✓                  | ✓                  |                    |                    | ✓                  |                    |                  |                   |               |               |                  |
|                      | TM <sup>1+</sup> =Ru                                        | ✓           | ✓                  |                    |                    |                    | ✓                  |                    |                  |                   |               |               |                  |
|                      | TM <sup>1+</sup> =Cr                                        | ✓           | ✓                  |                    |                    |                    |                    |                    |                  |                   |               |               | ✓                |
| TM <sup>1+</sup> =Tc | ✓                                                           |             | ✓                  |                    |                    |                    |                    |                    |                  |                   |               |               |                  |
| YTMFO <sub>3</sub>   | TM <sup>1+</sup> =Co                                        | ✓           | ✓                  |                    |                    |                    |                    |                    |                  |                   |               | ✓             | ✓                |
|                      | TM <sup>2+</sup> =Cr, Fe, Ti                                | ✓           | ✓                  |                    |                    |                    |                    |                    |                  |                   |               |               | ✓                |
|                      | TM <sup>2+</sup> =V                                         |             | ✓                  |                    |                    |                    | ✓                  |                    |                  |                   |               |               | ✓                |
| NaOsO <sub>3</sub>   |                                                             | ✓           |                    | ✓                  |                    |                    |                    |                    |                  |                   | ✓             |               |                  |
| BaPbO <sub>3</sub>   |                                                             | ✓           |                    |                    |                    |                    |                    |                    | ✓                |                   |               |               |                  |

 Fig. S2 The calculated crystal structure of 76 kinds of ABO<sub>3</sub> perovskites in this work.

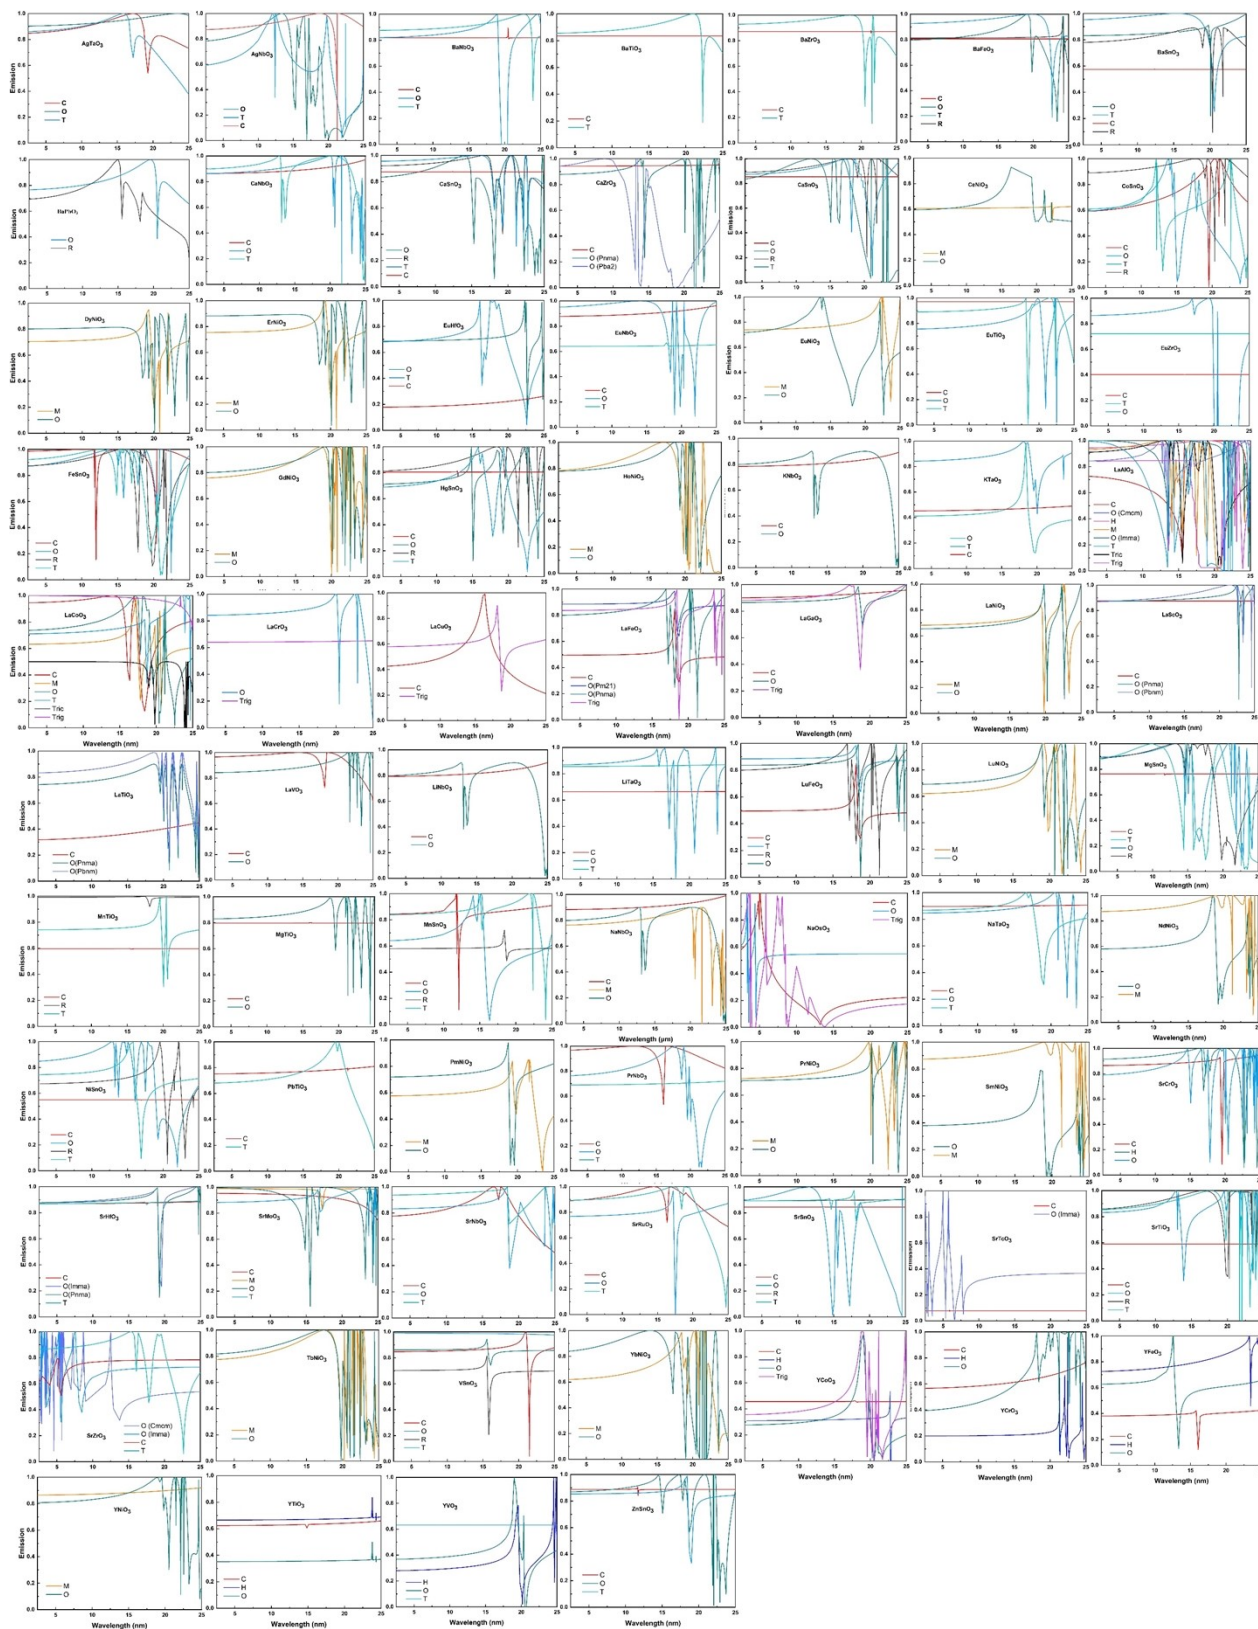
 Fig. S3 MIR emission spectrum (2-25μm) of 76 kinds of ABO<sub>3</sub>.

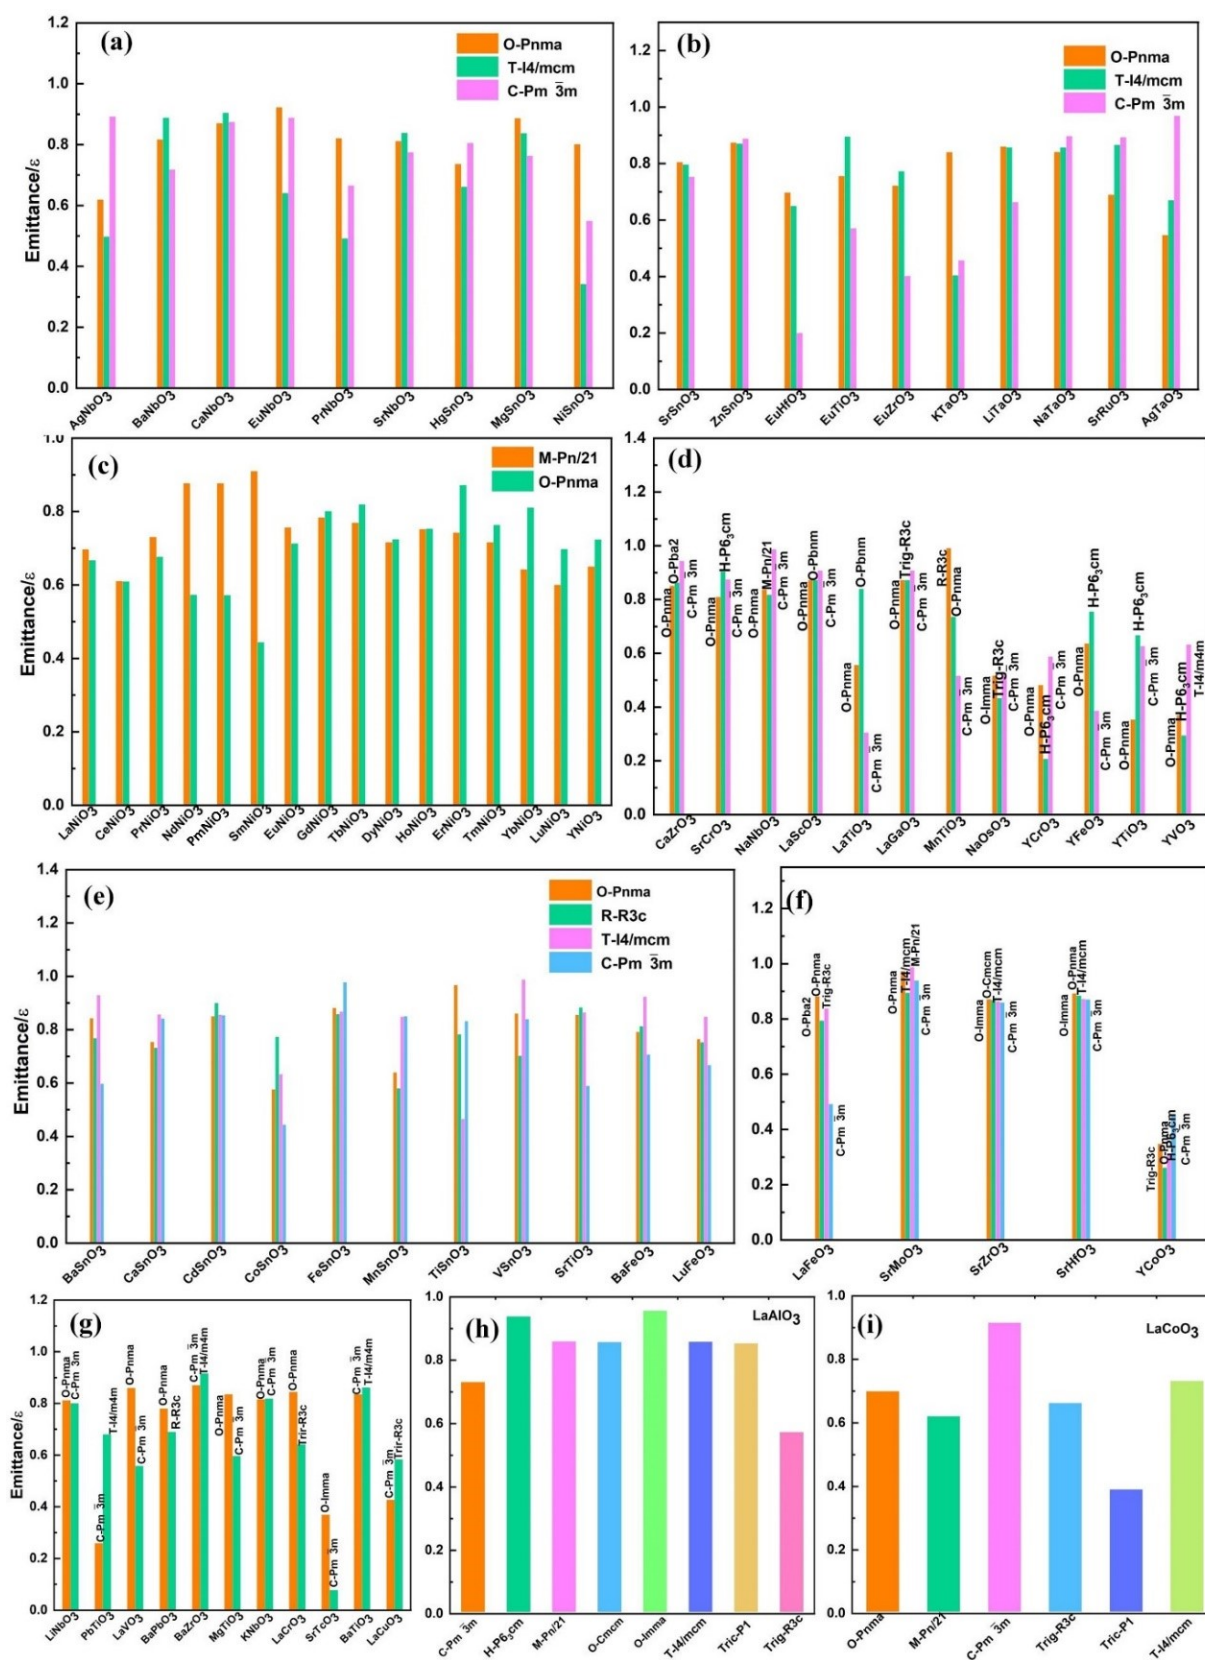

Fig. S4 Average MIR emissivity (2-25μm) of 76 kinds of ABO<sub>3</sub>.



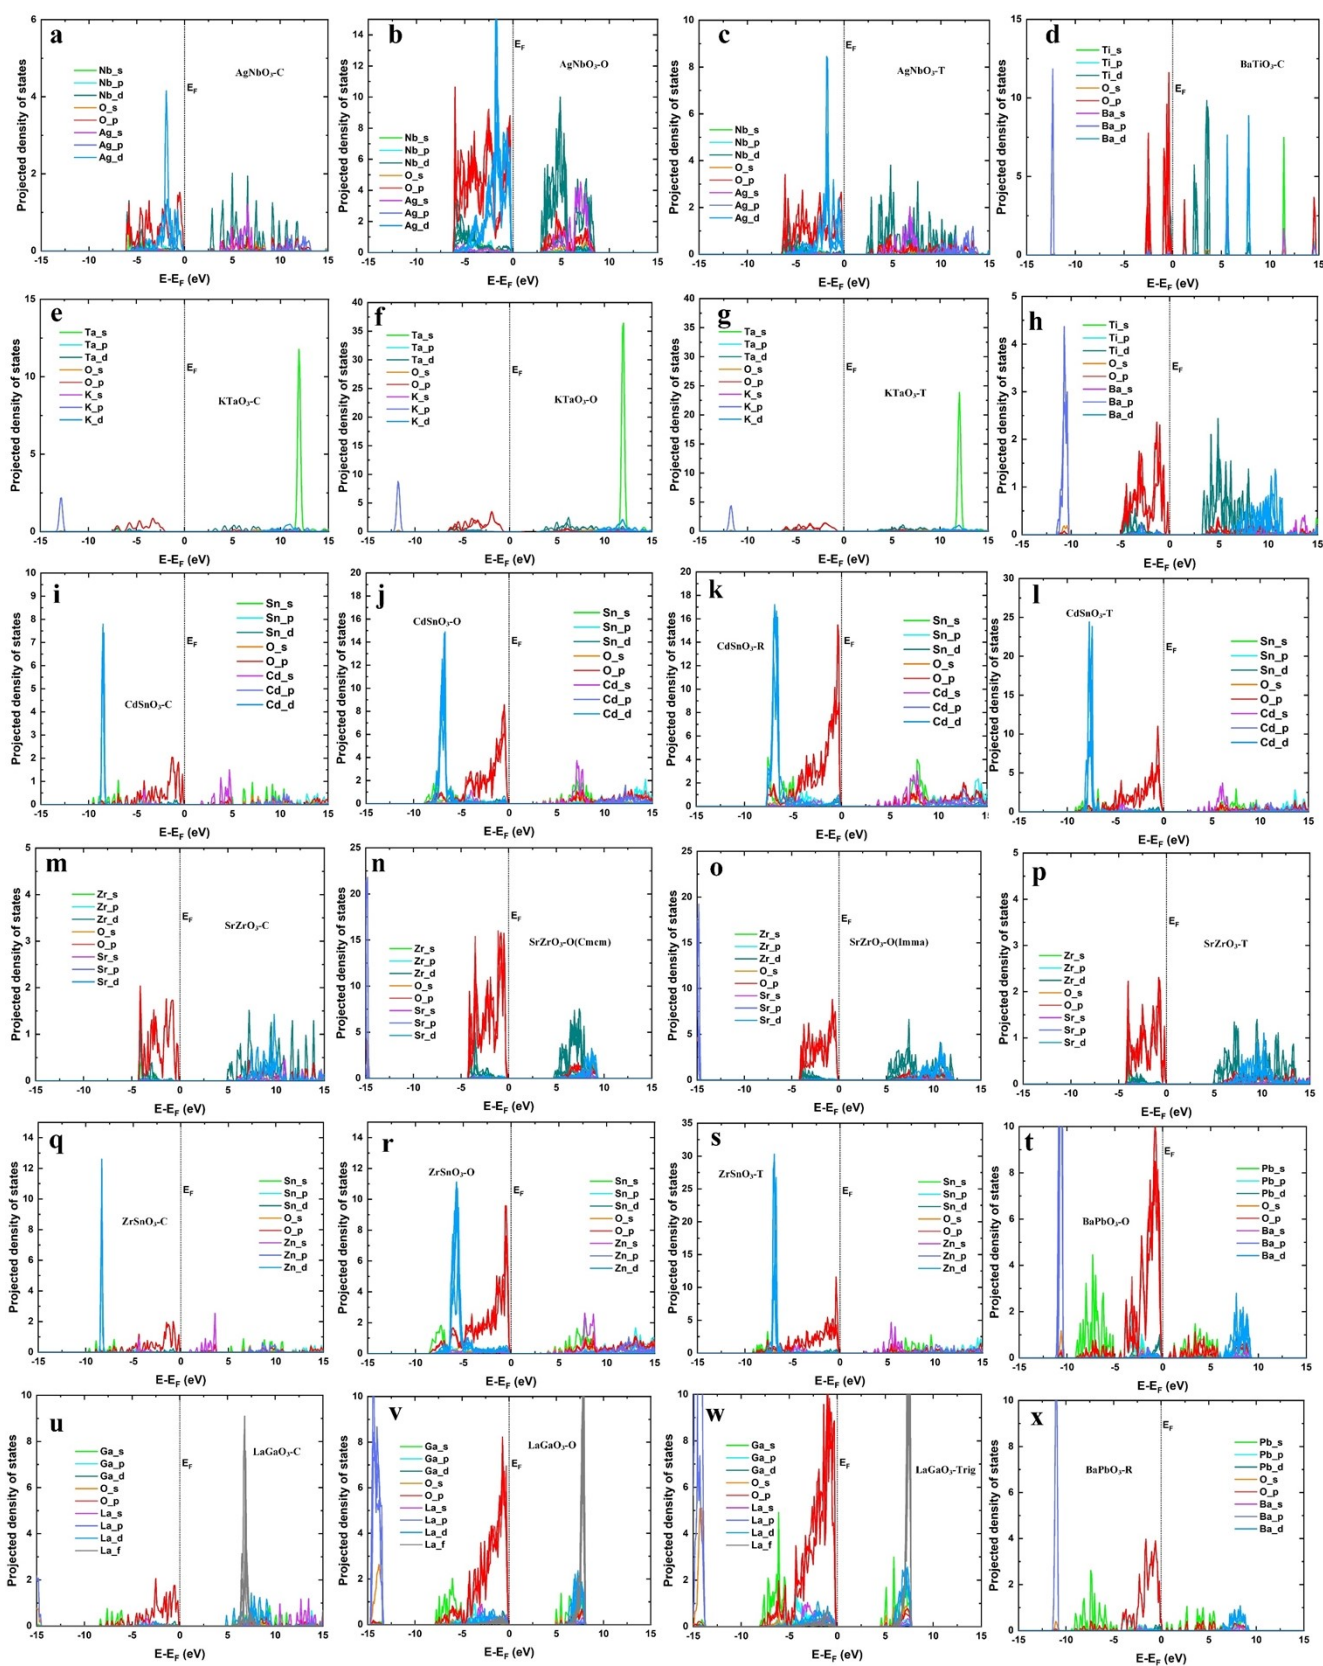

Fig. S5 Projected density of states of band insulators  $\text{AgNbO}_3$ ,  $\text{BaTiO}_3$ ,  $\text{KTaO}_3$ ,  $\text{CdSnO}_3$ ,  $\text{ZnSnO}_3$ ,  $\text{SrZrO}_3$ ,  $\text{LaGaO}_3$ ,  $\text{BaPbO}_3$ .

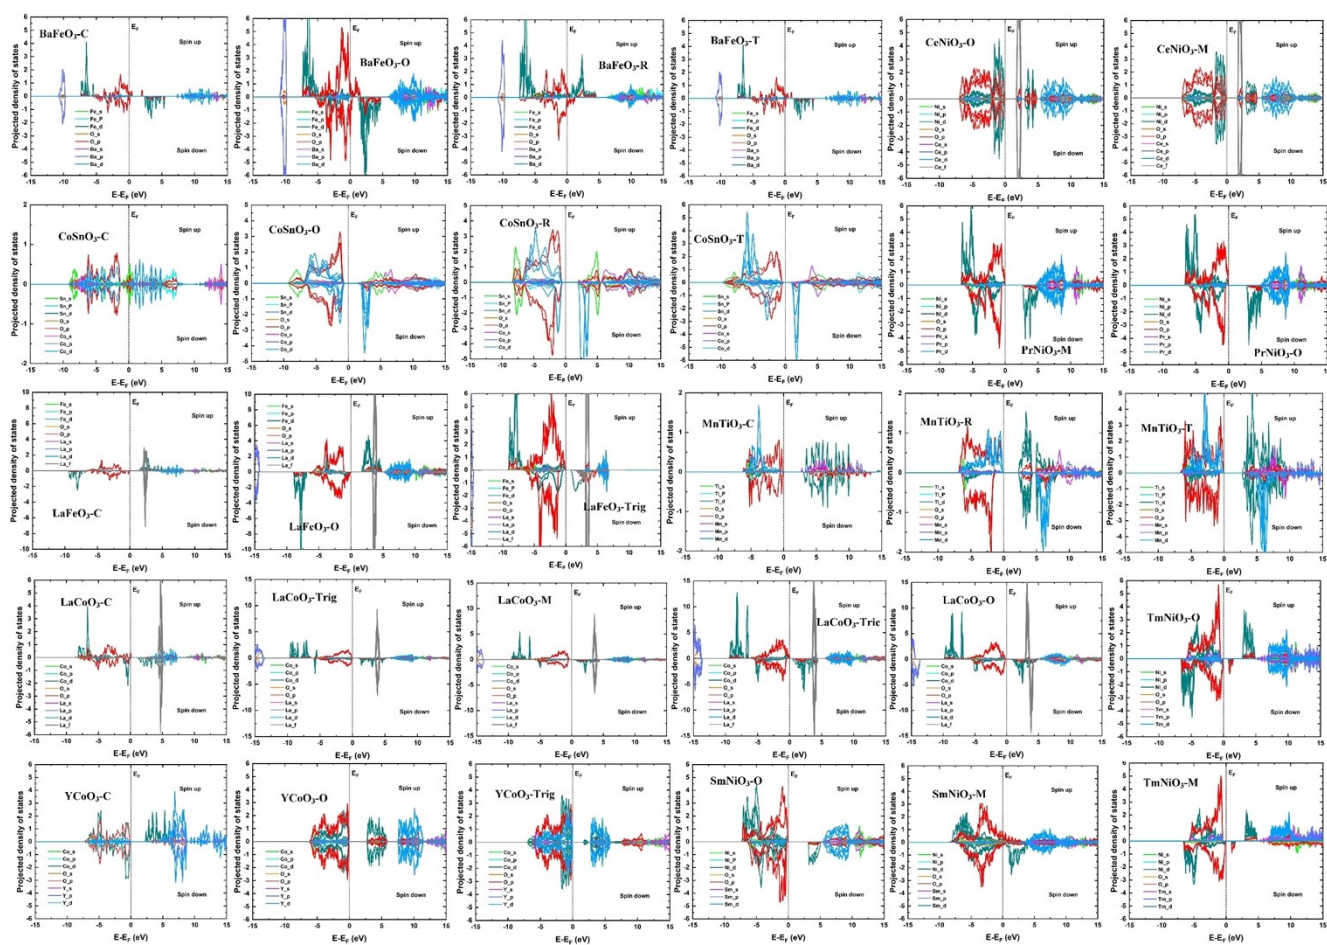

Fig. S6 Projected density of states of CeNiO<sub>3</sub>, TmNiO<sub>3</sub>, PrNiO<sub>3</sub>, SmNiO<sub>3</sub>, BaFeO<sub>3</sub>, LaFeO<sub>3</sub>, LaCoO<sub>3</sub>, CoSnO<sub>3</sub>, MnTiO<sub>3</sub>, and YCoO<sub>3</sub>.

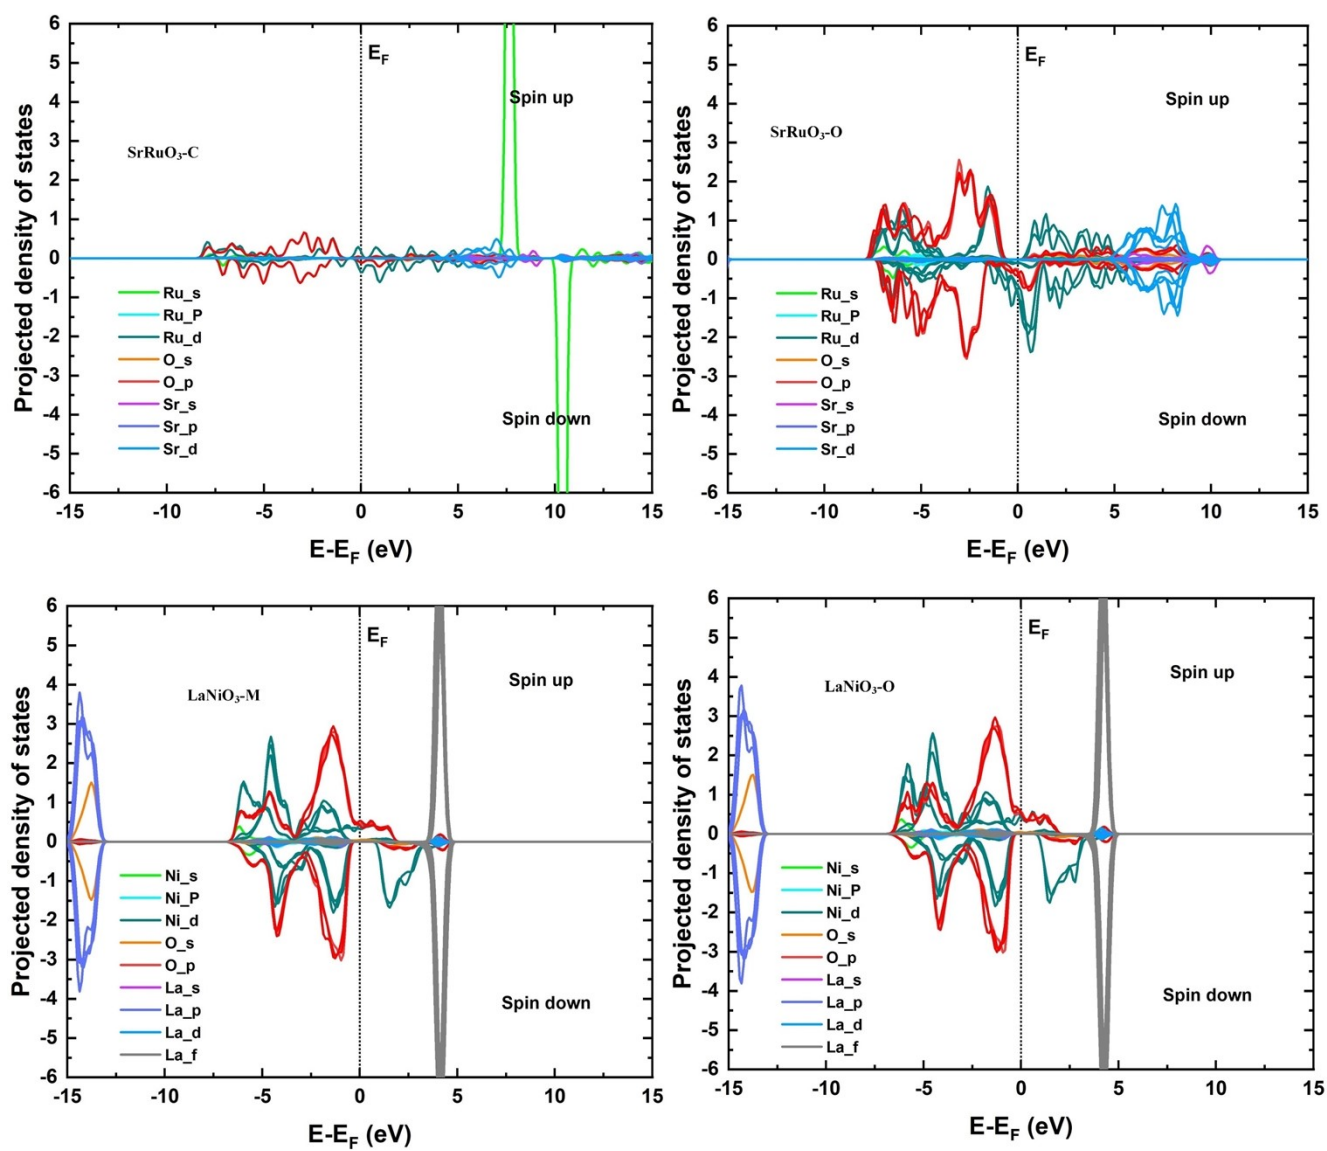

Fig. S7 Projected density of states of metals SrRuO<sub>3</sub> and LaNiO<sub>3</sub>.
